# Supplementary material for: Conformational Control of Donor–Acceptor Molecules Using Non-covalent Interactions
Source: PubMed Central journal article supplement (PMC11440601; doi:10.1021/acs.jpca.4c03711), 2024-09-17
Supplement: jp4c03711_si_001.pdf [file jp4c03711_si_001.pdf]

# Supporting Information: Conformational Control of Donor-Acceptor Molecules using Non-Covalent Interactions

Shawana Ahmad, Julien Eng, and Thomas J. Penfold\*

*Chemistry - School of Natural and Environmental Sciences, Newcastle University,  
Newcastle upon-Tyne, NE1 7RU, United Kingdom*

E-mail: tom.penfold@ncl.ac.uk

## List of Figures

|    |                                                                                                                    |     |
|----|--------------------------------------------------------------------------------------------------------------------|-----|
| S1 | Structure and $S_1$ density difference associated with the ground state optimised structure of <b>1a</b> . . . . . | S16 |
| S2 | Structure and $T_1$ density difference associated with the $T_1$ state optimised structure of <b>1a</b> . . . . .  | S16 |
| S3 | Structure and $S_1$ density difference associated with the $S_1$ state optimised structure of <b>1a</b> . . . . .  | S17 |
| S4 | Structure and $S_1$ density difference associated with the ground state optimised structure of <b>1b</b> . . . . . | S17 |
| S5 | Structure and $T_1$ density difference associated with the $T_1$ state optimised structure of <b>1b</b> . . . . .  | S18 |
| S6 | Structure and $S_1$ density difference associated with the $S_1$ state optimised structure of <b>1b</b> . . . . .  | S18 |

|     |                                                                                                                       |     |
|-----|-----------------------------------------------------------------------------------------------------------------------|-----|
| S7  | Structure and $S_1$ density difference associated with the ground state optimised<br>structure of <b>1c</b> . . . . . | S19 |
| S8  | Structure and $T_1$ density difference associated with the $T_1$ state optimised<br>structure of <b>1c</b> . . . . .  | S19 |
| S9  | Structure and $S_1$ density difference associated with the $S_1$ state optimised<br>structure of <b>1c</b> . . . . .  | S20 |
| S10 | Structure and $S_1$ density difference associated with the ground state optimised<br>structure of <b>1d</b> . . . . . | S20 |
| S11 | Structure and $T_1$ density difference associated with the $T_1$ state optimised<br>structure of <b>1d</b> . . . . .  | S21 |
| S12 | Structure and $S_1$ density difference associated with the $S_1$ state optimised<br>structure of <b>1d</b> . . . . .  | S21 |
| S13 | Structure and $S_1$ density difference associated with the ground state optimised<br>structure of <b>2a</b> . . . . . | S22 |
| S14 | Structure and $T_1$ density difference associated with the $T_1$ state optimised<br>structure of <b>2a</b> . . . . .  | S22 |
| S15 | Structure and $S_1$ density difference associated with the $S_1$ state optimised<br>structure of <b>2a</b> . . . . .  | S23 |
| S16 | Structure and $S_1$ density difference associated with the ground state optimised<br>structure of <b>2b</b> . . . . . | S23 |
| S17 | Structure and $T_1$ density difference associated with the $T_1$ state optimised<br>structure of <b>2b</b> . . . . .  | S24 |
| S18 | Structure and $S_1$ density difference associated with the $S_1$ state optimised<br>structure of <b>2b</b> . . . . .  | S24 |
| S19 | Structure and $S_1$ density difference associated with the ground state optimised<br>structure of <b>2c</b> . . . . . | S25 |

|     |                                                                                                                                                                                                                                                                                                                                                                             |     |
|-----|-----------------------------------------------------------------------------------------------------------------------------------------------------------------------------------------------------------------------------------------------------------------------------------------------------------------------------------------------------------------------------|-----|
| S20 | Structure and $T_1$ density difference associated with the $T_1$ state optimised structure of <b>2c</b> . . . . .                                                                                                                                                                                                                                                           | S25 |
| S21 | Structure and $S_1$ density difference associated with the $S_1$ state optimised structure of <b>2c</b> . . . . .                                                                                                                                                                                                                                                           | S26 |
| S22 | Structure and $S_1$ density difference associated with the ground state optimised structure of <b>2d</b> . . . . .                                                                                                                                                                                                                                                          | S26 |
| S23 | Structure and $T_1$ density difference associated with the $T_1$ state optimised structure of <b>2d</b> . . . . .                                                                                                                                                                                                                                                           | S27 |
| S24 | Structure and $S_1$ density difference associated with the $S_1$ state optimised structure of <b>2d</b> . . . . .                                                                                                                                                                                                                                                           | S27 |
| S25 | Potential of the ground and excited state along a linear interpolations in internal coordinates (LIICs) between the twisted and planar ground state optimised structures of <b>1a</b> . Blue is calculated using the PBE0 functional, black with the optimally tuned LC-BLYP and red with the optimally tuned $\omega$ B97X-D4 exchange and correlation functional. . . . . | S28 |
| S26 | Potential of the ground and excited state along a linear interpolations in internal coordinates (LIICs) between the twisted and bent ground state optimised structures of <b>1b</b> . Blue is calculated using the PBE0 functional, black with the optimally tuned LC-BLYP and red with the optimally tuned $\omega$ B97X-D4 exchange and correlation functional. . . . .   | S29 |
| S27 | Potential of the ground and excited state along a linear interpolations in internal coordinates (LIICs) between the twisted and bent ground state optimised structures of <b>1c</b> . Blue is calculated using the PBE0 functional, black with the optimally tuned LC-BLYP and red with the optimally tuned $\omega$ B97X-D4 exchange and correlation functional. . . . .   | S29 |

|     |                                                                                                                                                                                                                                                                                                                                                                           |     |
|-----|---------------------------------------------------------------------------------------------------------------------------------------------------------------------------------------------------------------------------------------------------------------------------------------------------------------------------------------------------------------------------|-----|
| S28 | Potential of the ground and excited state along a linear interpolations in internal coordinates (LIICs) between the twisted and bent ground state optimised structures of <b>1d</b> . Blue is calculated using the PBE0 functional, black with the optimally tuned LC-BLYP and red with the optimally tuned $\omega$ B97X-D4 exchange and correlation functional. . . . . | S30 |
|-----|---------------------------------------------------------------------------------------------------------------------------------------------------------------------------------------------------------------------------------------------------------------------------------------------------------------------------------------------------------------------------|-----|

## List of Tables

|    |                                                                                                                                                                                                                                                                                                                                                        |    |
|----|--------------------------------------------------------------------------------------------------------------------------------------------------------------------------------------------------------------------------------------------------------------------------------------------------------------------------------------------------------|----|
| S1 | Electronic structure at the optimised geometry of the electronic ground and lowest $S_1$ and $T_1$ states of the twisted conformer of <b>1a</b> . All energies relative to the lowest energy conformer of the <b>1a</b> molecule (planar). CT = charge transfer, LE(A) = Local exciton on the acceptor and LE(D) = Local exciton on the donor. . . . . | S8 |
| S2 | Electronic structure at the optimised geometry of the electronic ground and lowest $S_1$ and $T_1$ states of the planar conformer of <b>1a</b> . All energies relative to the lowest energy conformer of the <b>1a</b> molecule (planar). CT = charge transfer, LE(A) = Local exciton on the acceptor and LE(D) = Local exciton on the donor. . . . .  | S8 |
| S3 | Electronic structure at the optimised geometry of the electronic ground and lowest $S_1$ and $T_1$ states of the twisted conformer of <b>1b</b> . All energies relative to the lowest energy conformer of the <b>1b</b> molecule (bent). CT = charge transfer, LE(A) = Local exciton on the acceptor and LE(D) = Local exciton on the donor. . . . .   | S9 |

|    |                                                                                                                                                                                                                                                                                                                                                         |     |
|----|---------------------------------------------------------------------------------------------------------------------------------------------------------------------------------------------------------------------------------------------------------------------------------------------------------------------------------------------------------|-----|
| S4 | Electronic structure at the optimised geometry of the electronic ground and lowest $S_1$ and $T_1$ states of the bent conformer of <b>1b</b> . All energies relative to the lowest energy conformer of the <b>1b</b> molecule (bent). CT = charge transfer, LE(A) = Local exciton on the acceptor and LE(D) = Local exciton on the donor. . . . .       | S9  |
| S5 | Electronic structure at the optimised geometry of the electronic ground and lowest $S_1$ and $T_1$ states of the twisted conformer of <b>1c</b> . All energies relative to the lowest energy conformer of the <b>1c</b> molecule (twisted). CT = charge transfer, LE(A) = Local exciton on the acceptor and LE(D) = Local exciton on the donor. . . . . | S10 |
| S6 | Electronic structure at the optimised geometry of the electronic ground and lowest $S_1$ and $T_1$ states of the bent conformer of <b>1c</b> . All energies relative to the lowest energy conformer of the <b>1c</b> molecule (twisted). CT = charge transfer, LE(A) = Local exciton on the acceptor and LE(D) = Local exciton on the donor. . . . .    | S10 |
| S7 | Electronic structure at the optimised geometry of the electronic ground and lowest $S_1$ and $T_1$ states of the twisted conformer of <b>1d</b> . All energies relative to the lowest energy conformer of the <b>1d</b> molecule (twisted). CT = charge transfer, LE(A) = Local exciton on the acceptor and LE(D) = Local exciton on the donor. . . . . | S11 |
| S8 | Electronic structure at the optimised geometry of the electronic ground and lowest $S_1$ and $T_1$ states of the bent conformer of <b>1d</b> . All energies relative to the lowest energy conformer of the <b>1d</b> molecule (twisted). CT = charge transfer, LE(A) = Local exciton on the acceptor and LE(D) = Local exciton on the donor. . . . .    | S11 |

|     |                                                                                                                                                                                                                                                                                                                                                         |     |
|-----|---------------------------------------------------------------------------------------------------------------------------------------------------------------------------------------------------------------------------------------------------------------------------------------------------------------------------------------------------------|-----|
| S9  | Electronic structure at the optimised geometry of the electronic ground and lowest $S_1$ and $T_1$ states of the twisted conformer of <b>2a</b> . All energies relative to the lowest energy conformer of the <b>2a</b> molecule (bent). CT = charge transfer, LE(A) = Local exciton on the acceptor and LE(D) = Local exciton on the donor. . . . .    | S12 |
| S10 | Electronic structure at the optimised geometry of the electronic ground and lowest $S_1$ and $T_1$ states of the bent conformer of <b>2a</b> . All energies relative to the lowest energy conformer of the <b>2a</b> molecule (bent). CT = charge transfer, LE(A) = Local exciton on the acceptor and LE(D) = Local exciton on the donor. . . . .       | S12 |
| S11 | Electronic structure at the optimised geometry of the electronic ground and lowest $S_1$ and $T_1$ states of the twisted conformer of <b>2b</b> . All energies relative to the lowest energy conformer of the <b>2b</b> molecule (bent). CT = charge transfer, LE(A) = Local exciton on the acceptor and LE(D) = Local exciton on the donor. . . . .    | S13 |
| S12 | Electronic structure at the optimised geometry of the electronic ground and lowest $S_1$ and $T_1$ states of the bent conformer of <b>2b</b> . All energies relative to the lowest energy conformer of the <b>2b</b> molecule (bent). CT = charge transfer, LE(A) = Local exciton on the acceptor and LE(D) = Local exciton on the donor. . . . .       | S13 |
| S13 | Electronic structure at the optimised geometry of the electronic ground and lowest $S_1$ and $T_1$ states of the twisted conformer of <b>2c</b> . All energies relative to the lowest energy conformer of the <b>2c</b> molecule (twisted). CT = charge transfer, LE(A) = Local exciton on the acceptor and LE(D) = Local exciton on the donor. . . . . | S14 |

|     |                                                                                                                                                                                                                                                                                                                                                      |     |
|-----|------------------------------------------------------------------------------------------------------------------------------------------------------------------------------------------------------------------------------------------------------------------------------------------------------------------------------------------------------|-----|
| S14 | Electronic structure at the optimised geometry of the electronic ground and lowest $S_1$ and $T_1$ states of the bent conformer of <b>2c</b> . All energies relative to the lowest energy conformer of the <b>2c</b> molecule (twisted). CT = charge transfer, LE(A) = Local exciton on the acceptor and LE(D) = Local exciton on the donor. . . . . | S14 |
| S15 | Electronic structure at the optimised geometry of the electronic ground and lowest $S_1$ and $T_1$ states of the bent conformer of <b>2d</b> . All energies relative to the lowest energy conformer of the <b>2d</b> molecule (twisted). CT = charge transfer, LE(A) = Local exciton on the acceptor and LE(D) = Local exciton on the donor. . . . . | S15 |
| S16 | Analysis of the geometric and electronic structure properties obtained from 15 ps of <i>ab initio</i> molecular dynamics in the electronic ground ( $S_0$ ) and first singlet excited state ( $S_1$ ). . . . .                                                                                                                                       | S31 |

Table S1: Electronic structure at the optimised geometry of the electronic ground and lowest  $S_1$  and  $T_1$  states of the twisted conformer of **1a**. All energies relative to the lowest energy conformer of the **1a** molecule (planar). CT = charge transfer, LE(A) = Local exciton on the acceptor and LE(D) = Local exciton on the donor.

| Ground State |        |                        | $T_1^{\text{MIN}}$ |                        | $S_1^{\text{MIN}}$ |                        |
|--------------|--------|------------------------|--------------------|------------------------|--------------------|------------------------|
| State        | Nature | $\Delta E / \text{eV}$ | Nature             | $\Delta E / \text{eV}$ | Nature             | $\Delta E / \text{eV}$ |
| $S_0$        | –      | 0.56                   | –                  | 0.86                   | –                  | 1.03                   |
| $S_1$        | CT     | 4.13                   | CT                 | 3.87                   | CT                 | 3.88                   |
| $S_2$        | CT     | 4.64                   | CT                 | 4.56                   | CT                 | 4.61                   |
| $S_3$        | CT     | 4.74                   | CT                 | 4.71                   | CT                 | 4.79                   |
| $T_1$        | LE(A)  | 3.98                   | CT                 | 3.86                   | CT                 | 3.87                   |
| $T_2$        | LE(A)  | 4.09                   | LE(A)              | 4.19                   | LE(A)              | 4.29                   |
| $T_3$        | CT     | 4.12                   | LE(D)              | 4.35                   | LE(D)              | 4.50                   |

Table S2: Electronic structure at the optimised geometry of the electronic ground and lowest  $S_1$  and  $T_1$  states of the planar conformer of **1a**. All energies relative to the lowest energy conformer of the **1a** molecule (planar). CT = charge transfer, LE(A) = Local exciton on the acceptor and LE(D) = Local exciton on the donor.

| Ground State |            |                        | $T_1^{\text{MIN}}$ |                        | $S_1^{\text{MIN}}$ |                        |
|--------------|------------|------------------------|--------------------|------------------------|--------------------|------------------------|
| State        | Nature     | $\Delta E / \text{eV}$ | Nature             | $\Delta E / \text{eV}$ | Nature             | $\Delta E / \text{eV}$ |
| $S_0$        | –          | 0.00                   | –                  | 0.44                   | –                  | 0.59                   |
| $S_1$        | CT + LE(A) | 4.04                   | LE(A)              | 4.29                   | CT                 | 3.70                   |
| $S_2$        | CT         | 4.40                   | CT                 | 4.36                   | CT                 | 4.28                   |
| $S_3$        | CT         | 4.44                   | CT + LE(A)         | 4.51                   | CT                 | 4.55                   |
| $T_1$        | LE(A)      | 3.28                   | LE(A)              | 2.85                   | CT + LE(A)         | 3.44                   |
| $T_2$        | LE(A) + CT | 3.37                   | LE(A)              | 3.77                   | LE(A) + CT         | 4.02                   |
| $T_3$        | LE(D)      | 3.59                   | LE(D)              | 4.03                   | LE(A) + CT         | 4.15                   |



Table S3: Electronic structure at the optimised geometry of the electronic ground and lowest  $S_1$  and  $T_1$  states of the twisted conformer of **1b**. All energies relative to the lowest energy conformer of the **1b** molecule (bent). CT = charge transfer, LE(A) = Local exciton on the acceptor and LE(D) = Local exciton on the donor.

| Ground State |            |                        | $T_1^{\text{MIN}}$ |                        | $S_1^{\text{MIN}}$ |                        |
|--------------|------------|------------------------|--------------------|------------------------|--------------------|------------------------|
| State        | Nature     | $\Delta E / \text{eV}$ | Nature             | $\Delta E / \text{eV}$ | Nature             | $\Delta E / \text{eV}$ |
| $S_0$        | –          | 0.18                   | –                  | 0.64                   | –                  | 0.67                   |
| $S_1$        | CT         | 3.62                   | CT                 | 3.31                   | CT                 | 3.32                   |
| $S_2$        | CT         | 4.19                   | CT                 | 4.15                   | CT                 | 4.15                   |
| $S_3$        | CT         | 4.20                   | CT                 | 4.21                   | CT                 | 4.23                   |
| $T_1$        | LE(A)      | 3.58                   | CT                 | 3.31                   | CT                 | 3.31                   |
| $T_2$        | CT + LE(D) | 3.61                   | LE(A)              | 3.89                   | LE(A)              | 3.91                   |
| $T_3$        | LE(A)      | 3.68                   | LE(D)              | 4.05                   | LE(D)              | 4.08                   |

Table S4: Electronic structure at the optimised geometry of the electronic ground and lowest  $S_1$  and  $T_1$  states of the bent conformer of **1b**. All energies relative to the lowest energy conformer of the **1b** molecule (bent). CT = charge transfer, LE(A) = Local exciton on the acceptor and LE(D) = Local exciton on the donor.

| Ground State |        |                        | $T_1^{\text{MIN}}$ |                        | $S_1^{\text{MIN}}$ |                        |
|--------------|--------|------------------------|--------------------|------------------------|--------------------|------------------------|
| State        | Nature | $\Delta E / \text{eV}$ | Nature             | $\Delta E / \text{eV}$ | Nature             | $\Delta E / \text{eV}$ |
| $S_0$        | –      | 0.00                   | –                  | 0.45                   | –                  | 0.66                   |
| $S_1$        | CT     | 4.05                   | LE(A)              | 4.28                   | LE(A)              | 3.91                   |
| $S_2$        | CT     | 4.35                   | CT                 | 4.35                   | CT                 | 4.61                   |
| $S_3$        | CT     | 4.42                   | CT + LE(A)         | 4.53                   | CT                 | 4.87                   |
| $T_1$        | LE(A)  | 3.27                   | LE(A)              | 2.85                   | LE(A)              | 3.19                   |
| $T_2$        | LE(A)  | 3.38                   | LE(A)              | 3.74                   | LE(A)              | 3.84                   |
| $T_3$        | LE(D)  | 3.84                   | LE(D)              | 3.94                   | LE(D)              | 4.51                   |

Table S5: Electronic structure at the optimised geometry of the electronic ground and lowest  $S_1$  and  $T_1$  states of the twisted conformer of **1c**. All energies relative to the lowest energy conformer of the **1c** molecule (twisted). CT = charge transfer, LE(A) = Local exciton on the acceptor and LE(D) = Local exciton on the donor.

| Ground State |        |                        | $T_1^{\text{MIN}}$ |                        | $S_1^{\text{MIN}}$ |                        |
|--------------|--------|------------------------|--------------------|------------------------|--------------------|------------------------|
| State        | Nature | $\Delta E / \text{eV}$ | Nature             | $\Delta E / \text{eV}$ | Nature             | $\Delta E / \text{eV}$ |
| $S_0$        | –      | 0.00                   | –                  | 0.53                   | –                  | 0.56                   |
| $S_1$        | CT     | 3.44                   | CT                 | 3.03                   | CT                 | 3.03                   |
| $S_2$        | CT     | 3.89                   | CT                 | 3.89                   | CT                 | 3.90                   |
| $S_3$        | LE(D)  | 4.30                   | CT                 | 4.09                   | CT                 | 4.09                   |
| $T_1$        | LE(A)  | 3.37                   | CT                 | 3.03                   | CT                 | 3.02                   |
| $T_2$        | CT     | 3.43                   | LE(A)              | 3.75                   | LE(A)              | 3.78                   |
| $T_3$        | LE(A)  | 3.51                   | LE(D)              | 3.85                   | LE(D)              | 3.88                   |

Table S6: Electronic structure at the optimised geometry of the electronic ground and lowest  $S_1$  and  $T_1$  states of the bent conformer of **1c**. All energies relative to the lowest energy conformer of the **1c** molecule (twisted). CT = charge transfer, LE(A) = Local exciton on the acceptor and LE(D) = Local exciton on the donor.

| Ground State |            |                        | $T_1^{\text{MIN}}$ |                        | $S_1^{\text{MIN}}$ |                        |
|--------------|------------|------------------------|--------------------|------------------------|--------------------|------------------------|
| State        | Nature     | $\Delta E / \text{eV}$ | Nature             | $\Delta E / \text{eV}$ | Nature             | $\Delta E / \text{eV}$ |
| $S_0$        | –          | 0.12                   | –                  | 0.72                   | –                  | –                      |
| $S_1$        | CT         | 3.89                   | CT                 | 4.04                   | –                  | –                      |
| $S_2$        | CT         | 4.25                   | CT + LE(A)         | 4.37                   | –                  | –                      |
| $S_3$        | LE(D)      | 4.47                   | LE(A)              | 4.46                   | –                  | –                      |
| $T_1$        | LE(A)      | 3.37                   | LE(A)              | 2.91                   | –                  | –                      |
| $T_2$        | LE(A) + CT | 3.44                   | LE(A)              | 3.87                   | –                  | –                      |
| $T_3$        | LE(D)      | 3.73                   | CT                 | 4.09                   | –                  | –                      |

Table S7: Electronic structure at the optimised geometry of the electronic ground and lowest  $S_1$  and  $T_1$  states of the twisted conformer of **1d**. All energies relative to the lowest energy conformer of the **1d** molecule (twisted). CT = charge transfer, LE(A) = Local exciton on the acceptor and LE(D) = Local exciton on the donor.

| Ground State |            |                        | $T_1^{\text{MIN}}$ |                        | $S_1^{\text{MIN}}$ |                        |
|--------------|------------|------------------------|--------------------|------------------------|--------------------|------------------------|
| State        | Nature     | $\Delta E / \text{eV}$ | Nature             | $\Delta E / \text{eV}$ | Nature             | $\Delta E / \text{eV}$ |
| $S_0$        | –          | 0.00                   | –                  | 0.29                   | –                  | 0.37                   |
| $S_1$        | CT         | 3.62                   | CT                 | 2.74                   | CT                 | 2.74                   |
| $S_2$        | CT + LE(D) | 3.88                   | CT                 | 3.34                   | CT                 | 3.39                   |
| $S_3$        | CT         | 3.90                   | CT                 | 3.65                   | CT                 | 3.67                   |
| $T_1$        | LE(A)      | 3.15                   | CT                 | 2.73                   | CT                 | 2.72                   |
| $T_2$        | LE(D)      | 3.22                   | CT                 | 3.31                   | CT                 | 3.37                   |
| $T_3$        | LE(A)      | 3.32                   | LE(D)              | 3.49                   | LE(D)              | 3.56                   |

Table S8: Electronic structure at the optimised geometry of the electronic ground and lowest  $S_1$  and  $T_1$  states of the bent conformer of **1d**. All energies relative to the lowest energy conformer of the **1d** molecule (twisted). CT = charge transfer, LE(A) = Local exciton on the acceptor and LE(D) = Local exciton on the donor.

| Ground State |            |                        | $T_1^{\text{MIN}}$ |                        | $S_1^{\text{MIN}}$ |                        |
|--------------|------------|------------------------|--------------------|------------------------|--------------------|------------------------|
| State        | Nature     | $\Delta E / \text{eV}$ | Nature             | $\Delta E / \text{eV}$ | Nature             | $\Delta E / \text{eV}$ |
| $S_0$        | –          | 0.42                   | –                  | –                      | –                  | –                      |
| $S_1$        | CT         | 4.11                   | –                  | –                      | –                  | –                      |
| $S_2$        | CT         | 4.30                   | –                  | –                      | –                  | –                      |
| $S_3$        | CT         | 4.44                   | –                  | –                      | –                  | –                      |
| $T_1$        | LE(A)      | 3.69                   | –                  | –                      | –                  | –                      |
| $T_2$        | LE(D)      | 3.76                   | –                  | –                      | –                  | –                      |
| $T_3$        | LE(A) + CT | 3.77                   | –                  | –                      | –                  | –                      |

Table S9: Electronic structure at the optimised geometry of the electronic ground and lowest  $S_1$  and  $T_1$  states of the twisted conformer of **2a**. All energies relative to the lowest energy conformer of the **2a** molecule (bent). CT = charge transfer, LE(A) = Local exciton on the acceptor and LE(D) = Local exciton on the donor.

| Ground State |        |                        | $T_1^{\text{MIN}}$ |                        | $S_1^{\text{MIN}}$ |                        |
|--------------|--------|------------------------|--------------------|------------------------|--------------------|------------------------|
| State        | Nature | $\Delta E / \text{eV}$ | Nature             | $\Delta E / \text{eV}$ | Nature             | $\Delta E / \text{eV}$ |
| $S_0$        | –      | –                      | –                  | 0.63                   | –                  | 0.71                   |
| $S_1$        | –      | –                      | CT                 | 3.04                   | CT                 | 3.01                   |
| $S_2$        | –      | –                      | CT                 | 3.91                   | CT                 | 3.91                   |
| $S_3$        | –      | –                      | LE(D)              | 4.65                   | LE(D)              | 4.88                   |
| $T_1$        | –      | –                      | CT                 | 2.99                   | CT                 | 3.00                   |
| $T_2$        | –      | –                      | CT                 | 3.85                   | CT                 | 3.91                   |
| $T_3$        | –      | –                      | LE(A)              | 3.92                   | LE(A)              | 3.96                   |

Table S10: Electronic structure at the optimised geometry of the electronic ground and lowest  $S_1$  and  $T_1$  states of the bent conformer of **2a**. All energies relative to the lowest energy conformer of the **2a** molecule (bent). CT = charge transfer, LE(A) = Local exciton on the acceptor and LE(D) = Local exciton on the donor.

| Ground State |            |                        | $T_1^{\text{MIN}}$ |                        | $S_1^{\text{MIN}}$ |                        |
|--------------|------------|------------------------|--------------------|------------------------|--------------------|------------------------|
| State        | Nature     | $\Delta E / \text{eV}$ | Nature             | $\Delta E / \text{eV}$ | Nature             | $\Delta E / \text{eV}$ |
| $S_0$        | –          | 0.00                   | –                  | 0.30                   | –                  | 0.39                   |
| $S_1$        | CT         | 4.01                   | LE(A) + CT         | 3.94                   | CT                 | 3.21                   |
| $S_2$        | CT         | 4.33                   | LE(A)              | 4.10                   | CT                 | 4.03                   |
| $S_3$        | LE(A)      | 4.51                   | LE(A) + CT         | 4.25                   | LE(A)              | 4.73                   |
| $T_1$        | LE(A)      | 3.23                   | LE(A)              | 2.48                   | CT                 | 3.00                   |
| $T_2$        | LE(A) + CT | 3.32                   | LE(A)              | 3.44                   | LE(A) + CT         | 3.70                   |
| $T_3$        | LE(A)      | 3.95                   | LE(A)              | 4.02                   | LE(A)              | 3.79                   |

Table S11: Electronic structure at the optimised geometry of the electronic ground and lowest  $S_1$  and  $T_1$  states of the twisted conformer of **2b**. All energies relative to the lowest energy conformer of the **2b** molecule (bent). CT = charge transfer, LE(A) = Local exciton on the acceptor and LE(D) = Local exciton on the donor.

| Ground State |        |                        | $T_1^{\text{MIN}}$ |                        | $S_1^{\text{MIN}}$ |                        |
|--------------|--------|------------------------|--------------------|------------------------|--------------------|------------------------|
| State        | Nature | $\Delta E / \text{eV}$ | Nature             | $\Delta E / \text{eV}$ | Nature             | $\Delta E / \text{eV}$ |
| $S_0$        | –      | –                      | –                  | –                      | –                  | 1.18                   |
| $S_1$        | –      | –                      | –                  | –                      | CT                 | 3.64                   |
| $S_2$        | –      | –                      | –                  | –                      | CT                 | 4.56                   |
| $S_3$        | –      | –                      | –                  | –                      | CT                 | 5.25                   |
| $T_1$        | –      | –                      | –                  | –                      | CT                 | 3.63                   |
| $T_2$        | –      | –                      | –                  | –                      | LE(A)              | 4.41                   |
| $T_3$        | –      | –                      | –                  | –                      | CT                 | 4.54                   |

Table S12: Electronic structure at the optimised geometry of the electronic ground and lowest  $S_1$  and  $T_1$  states of the bent conformer of **2b**. All energies relative to the lowest energy conformer of the **2b** molecule (bent). CT = charge transfer, LE(A) = Local exciton on the acceptor and LE(D) = Local exciton on the donor.

| Ground State |            |                        | $T_1^{\text{MIN}}$ |                        | $S_1^{\text{MIN}}$ |                        |
|--------------|------------|------------------------|--------------------|------------------------|--------------------|------------------------|
| State        | Nature     | $\Delta E / \text{eV}$ | Nature             | $\Delta E / \text{eV}$ | Nature             | $\Delta E / \text{eV}$ |
| $S_0$        | –          | 0.00                   | –                  | 0.70                   | –                  | 0.83                   |
| $S_1$        | CT + LE(A) | 4.14                   | CT                 | 4.46                   | CT                 | 3.67                   |
| $S_2$        | CT + LE(A) | 4.47                   | CT                 | 4.48                   | CT                 | 4.50                   |
| $S_3$        | LE(A)      | 4.50                   | CT                 | 4.71                   | CT                 | 4.96                   |
| $T_1$        | LE(A)      | 3.24                   | CT                 | 2.73                   | CT                 | 3.48                   |
| $T_2$        | LE(A)      | 3.63                   | LE(A)              | 3.84                   | CT + LE(A)         | 4.17                   |
| $T_3$        | LE(A)      | 3.97                   | LE(A)              | 4.29                   | LE(A)              | 4.20                   |

Table S13: Electronic structure at the optimised geometry of the electronic ground and lowest  $S_1$  and  $T_1$  states of the twisted conformer of **2c**. All energies relative to the lowest energy conformer of the **2c** molecule (twisted). CT = charge transfer, LE(A) = Local exciton on the acceptor and LE(D) = Local exciton on the donor.

| Ground State |        |                        | $T_1^{\text{MIN}}$ |                        | $S_1^{\text{MIN}}$ |                        |
|--------------|--------|------------------------|--------------------|------------------------|--------------------|------------------------|
| State        | Nature | $\Delta E / \text{eV}$ | Nature             | $\Delta E / \text{eV}$ | Nature             | $\Delta E / \text{eV}$ |
| $S_0$        | –      | 0.00                   | –                  | 0.85                   | –                  | 0.88                   |
| $S_1$        | CT     | 3.65                   | CT                 | 3.25                   | CT                 | 3.09                   |
| $S_2$        | CT     | 3.82                   | CT                 | 3.94                   | CT                 | 3.95                   |
| $S_3$        | LE(D)  | 4.25                   | CT                 | 4.41                   | CT                 | 4.41                   |
| $T_1$        | LE(A)  | 3.12                   | CT                 | 3.08                   | CT                 | 3.08                   |
| $T_2$        | LE(A)  | 3.38                   | CT                 | 3.93                   | CT                 | 3.94                   |
| $T_3$        | LE(D)  | 3.45                   | LE(A)              | 3.95                   | LE(A)              | 4.68                   |

Table S14: Electronic structure at the optimised geometry of the electronic ground and lowest  $S_1$  and  $T_1$  states of the bent conformer of **2c**. All energies relative to the lowest energy conformer of the **2c** molecule (twisted). CT = charge transfer, LE(A) = Local exciton on the acceptor and LE(D) = Local exciton on the donor.

| Ground State |        |                        | $T_1^{\text{MIN}}$ |                        | $S_1^{\text{MIN}}$ |                        |
|--------------|--------|------------------------|--------------------|------------------------|--------------------|------------------------|
| State        | Nature | $\Delta E / \text{eV}$ | Nature             | $\Delta E / \text{eV}$ | Nature             | $\Delta E / \text{eV}$ |
| $S_0$        | –      | 0.15                   | –                  | 0.80                   | –                  | –                      |
| $S_1$        | CT     | 4.08                   | CT                 | 4.39                   | –                  | –                      |
| $S_2$        | CT     | 4.39                   | LE(A)              | 4.54                   | –                  | –                      |
| $S_3$        | LE(A)  | 4.63                   | LE(A) + CT         | 4.75                   | –                  | –                      |
| $T_1$        | LE(A)  | 3.37                   | LE(A)              | 2.96                   | –                  | –                      |
| $T_2$        | LE(A)  | 3.48                   | LE(A)              | 3.95                   | –                  | –                      |
| $T_3$        | LE(D)  | 4.04                   | LE(A)              | 4.40                   | –                  | –                      |

Table S15: Electronic structure at the optimised geometry of the electronic ground and lowest  $S_1$  and  $T_1$  states of the bent conformer of **2d**. All energies relative to the lowest energy conformer of the **2d** molecule (twisted). CT = charge transfer, LE(A) = Local exciton on the acceptor and LE(D) = Local exciton on the donor.

| Ground State |            |                        | $T_1^{\text{MIN}}$ |                        | $S_1^{\text{MIN}}$ |                        |
|--------------|------------|------------------------|--------------------|------------------------|--------------------|------------------------|
| State        | Nature     | $\Delta E / \text{eV}$ | Nature             | $\Delta E / \text{eV}$ | Nature             | $\Delta E / \text{eV}$ |
| $S_0$        | –          | 0.00                   | –                  | 1.08                   | –                  | 0.92                   |
| $S_1$        | CT         | 3.78                   | CT                 | 3.30                   | CT                 | 3.24                   |
| $S_2$        | CT         | 3.99                   | CT                 | 4.21                   | CT                 | 4.08                   |
| $S_3$        | CT         | 4.09                   | CT                 | 4.25                   | CT                 | 4.14                   |
| $T_1$        | LE(A)      | 3.24                   | CT                 | 3.22                   | CT                 | 3.22                   |
| $T_2$        | LE(A)      | 3.39                   | CT + LE(A)         | 3.99                   | LE(A)              | 3.92                   |
| $T_3$        | CT + LE(D) | 3.70                   | CT                 | 4.11                   | LE(D)              | 4.04                   |

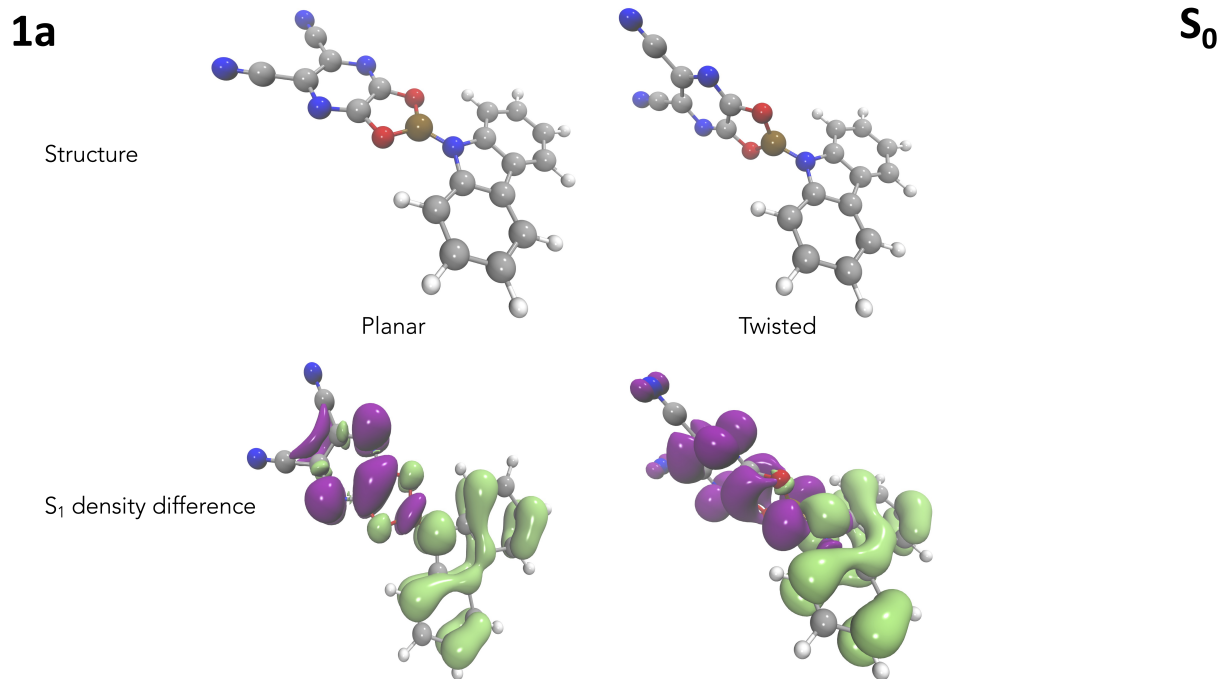

Figure S1: Structure and S<sub>1</sub> density difference associated with the ground state optimised structure of **1a**.

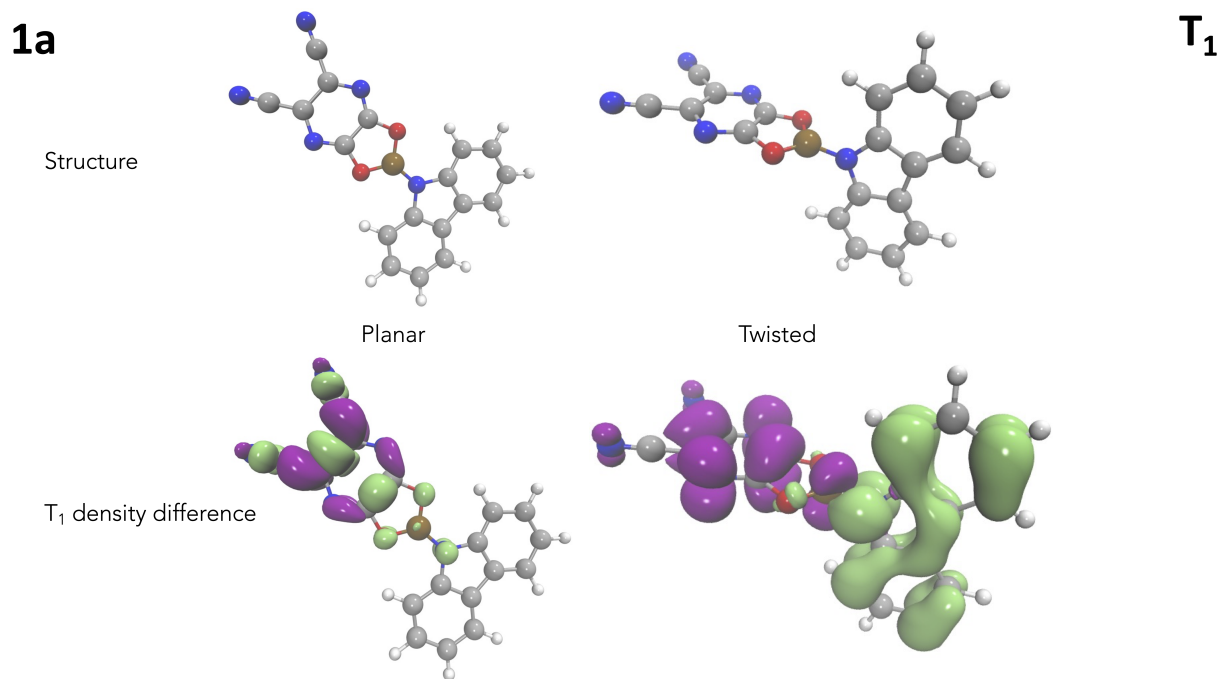

Figure S2: Structure and T<sub>1</sub> density difference associated with the T<sub>1</sub> state optimised structure of **1a**.



**1a****S<sub>1</sub>**

Structure

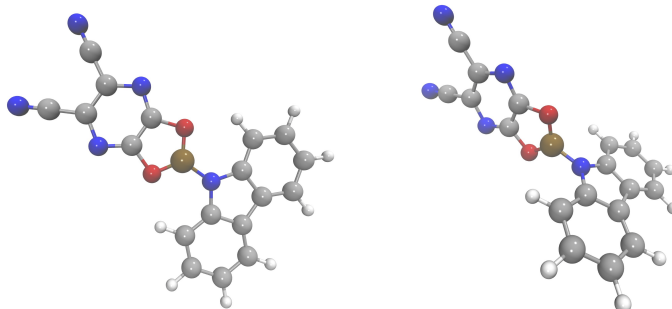

Planar

Twisted

S<sub>1</sub> density difference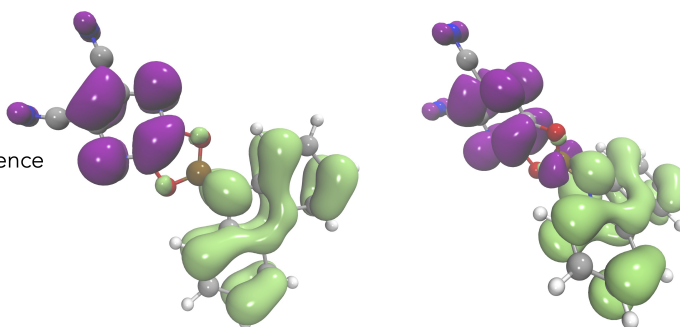

Figure S3: Structure and S<sub>1</sub> density difference associated with the S<sub>1</sub> state optimised structure of **1a**.

**1b****S<sub>0</sub>**

Structure

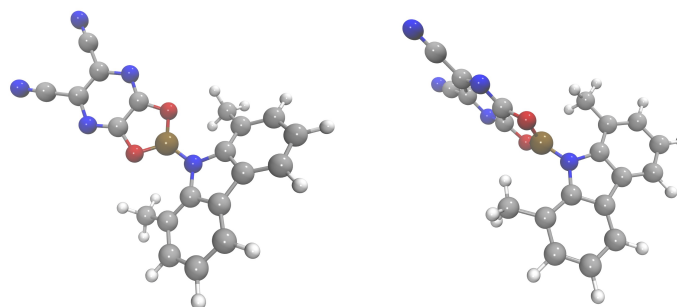

Bent

Twisted

S<sub>1</sub> density difference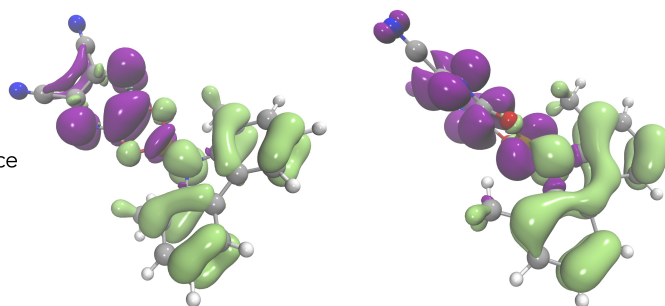

Figure S4: Structure and S<sub>1</sub> density difference associated with the ground state optimised structure of **1b**.

**1b**

Structure

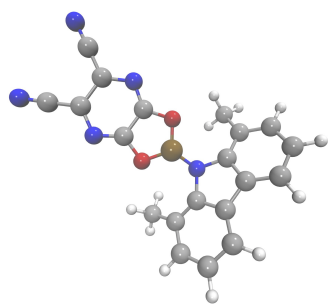

Bent

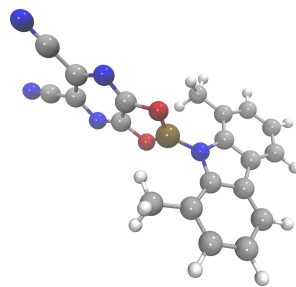

Twisted

**T<sub>1</sub>**S<sub>1</sub> density difference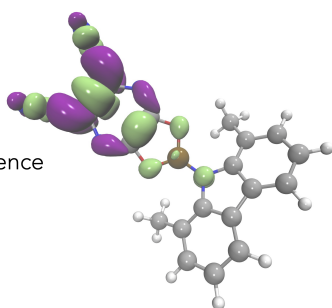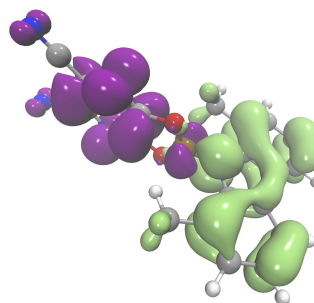

Figure S5: Structure and T<sub>1</sub> density difference associated with the T<sub>1</sub> state optimised structure of **1b**.

**1b**

Structure

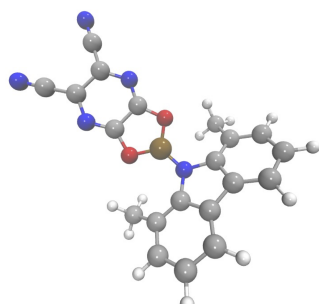

Bent

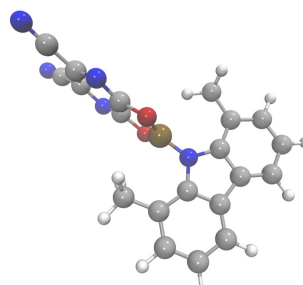

Twisted

**S<sub>1</sub>**S<sub>1</sub> density difference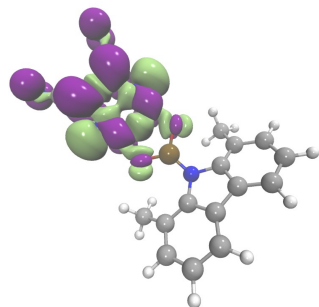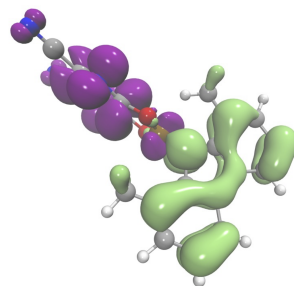

Figure S6: Structure and S<sub>1</sub> density difference associated with the S<sub>1</sub> state optimised structure of **1b**.

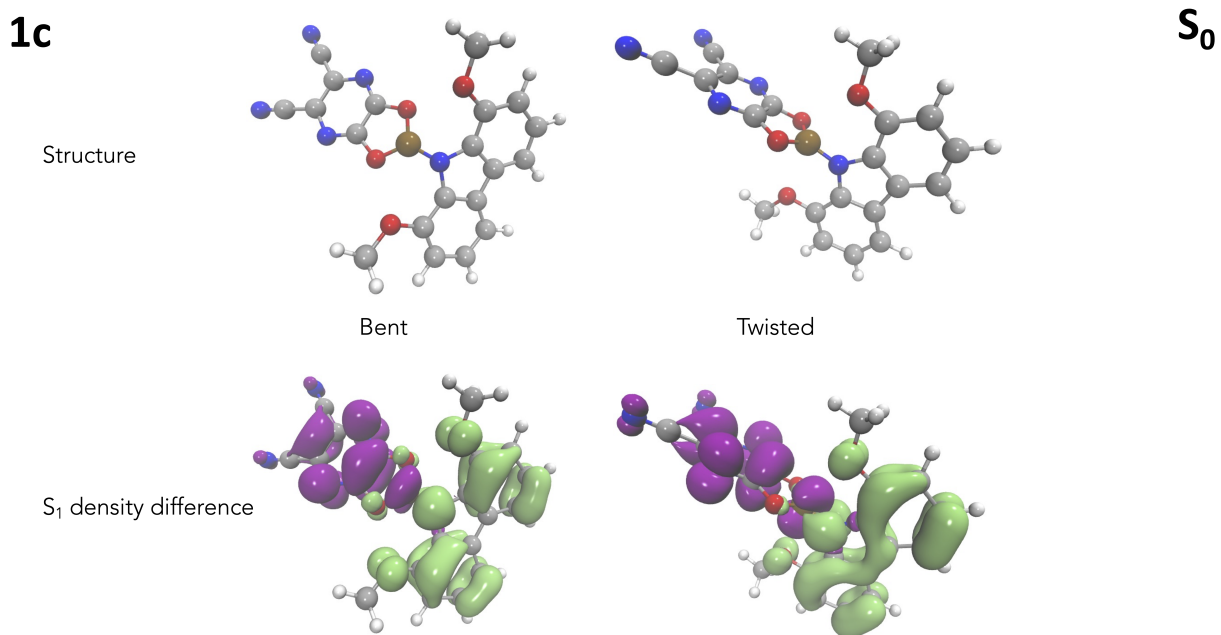

Figure S7: Structure and S<sub>1</sub> density difference associated with the ground state optimised structure of **1c**.

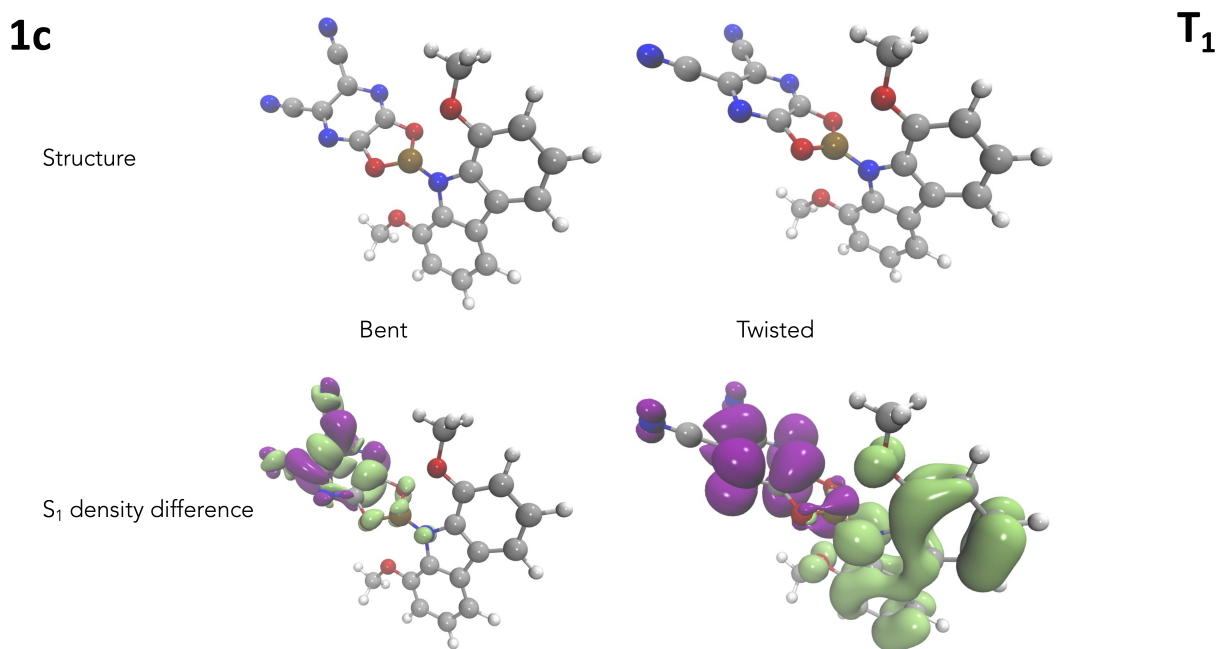

Figure S8: Structure and T<sub>1</sub> density difference associated with the T<sub>1</sub> state optimised structure of **1c**.

**1c****S<sub>1</sub>**

Structure

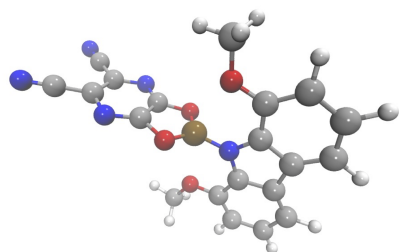

Twisted

S<sub>1</sub> density difference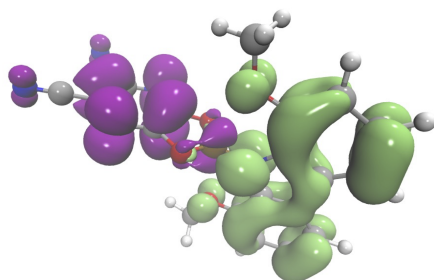

Figure S9: Structure and S<sub>1</sub> density difference associated with the S<sub>1</sub> state optimized structure of **1c**.

**1d****S<sub>0</sub>**

Structure

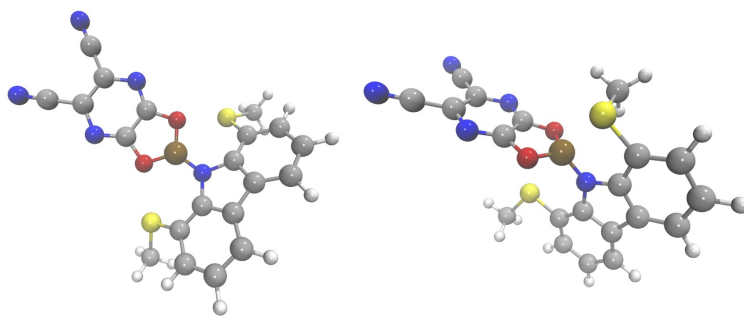

Bent

Twisted

S<sub>1</sub> density difference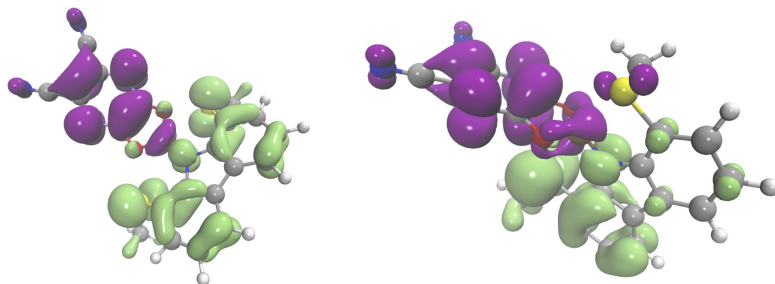

Figure S10: Structure and S<sub>1</sub> density difference associated with the ground state optimized structure of **1d**.

**1d**

**T<sub>1</sub>**

Structure

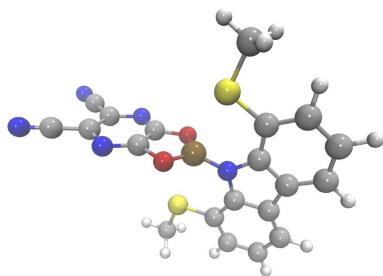

Twisted

S<sub>1</sub> density difference

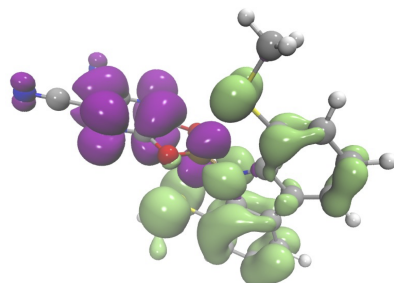

Figure S11: Structure and T<sub>1</sub> density difference associated with the T<sub>1</sub> state optimised structure of **1d**.

**1d**

**S<sub>1</sub>**

Structure

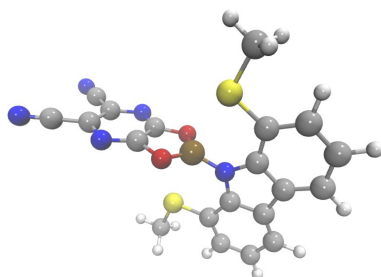

Twisted

S<sub>1</sub> density difference

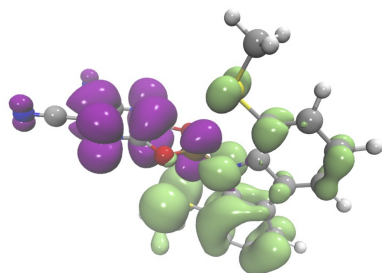

Figure S12: Structure and S<sub>1</sub> density difference associated with the S<sub>1</sub> state optimised structure of **1d**.

**2a****S<sub>0</sub>**

Structure

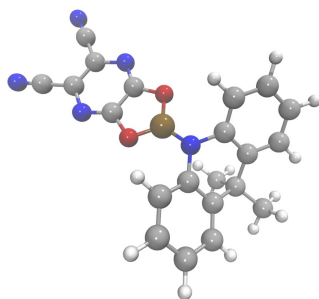

Bent

S<sub>1</sub> density difference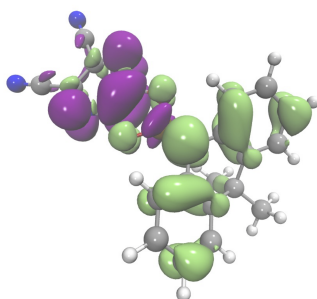

Figure S13: Structure and S<sub>1</sub> density difference associated with the ground state optimised structure of **2a**.

**2a****T<sub>1</sub>**

Structure

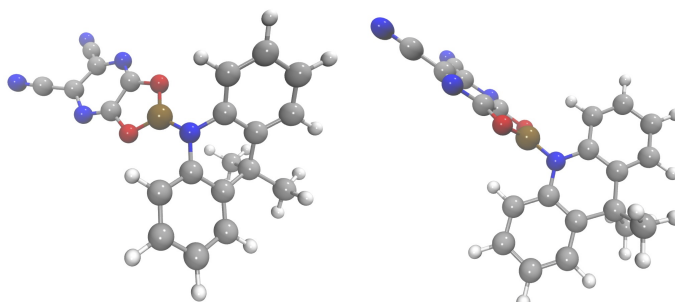

Bent

Twisted

T<sub>1</sub> density difference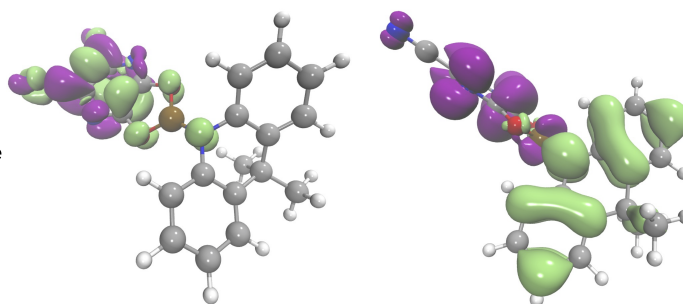

Figure S14: Structure and T<sub>1</sub> density difference associated with the T<sub>1</sub> state optimised structure of **2a**.

**2a**

Structure

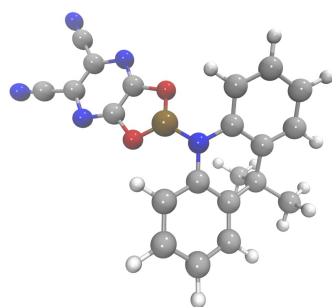

Bent

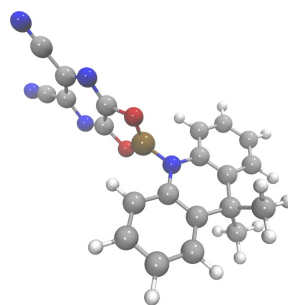

Twisted

**S<sub>1</sub>**

S<sub>1</sub> density difference

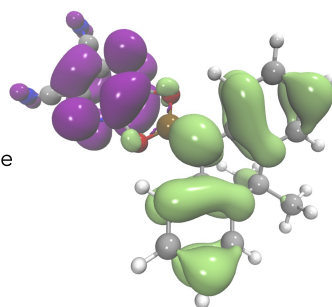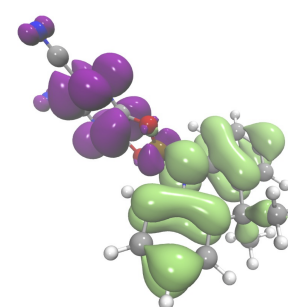

Figure S15: Structure and S<sub>1</sub> density difference associated with the S<sub>1</sub> state optimised structure of **2a**.

**2b**

Structure

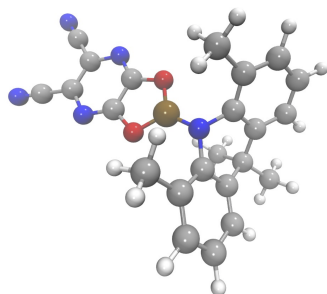

Bent

**S<sub>0</sub>**

S<sub>1</sub> density difference

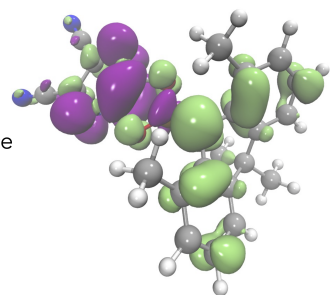

Figure S16: Structure and S<sub>1</sub> density difference associated with the ground state optimised structure of **2b**.

**2b****T<sub>1</sub>**

Structure

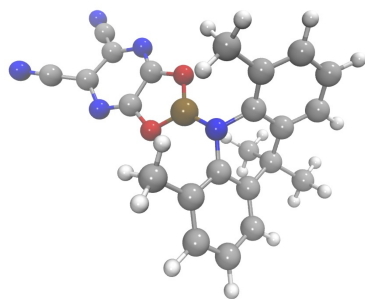

Bent

T<sub>1</sub> density difference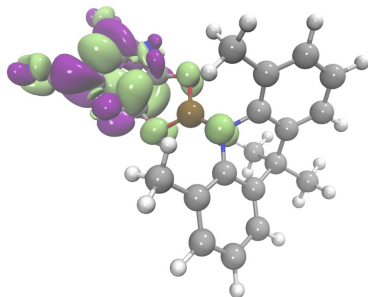

Figure S17: Structure and T<sub>1</sub> density difference associated with the T<sub>1</sub> state optimised structure of **2b**.

**2b****S<sub>1</sub>**

Structure

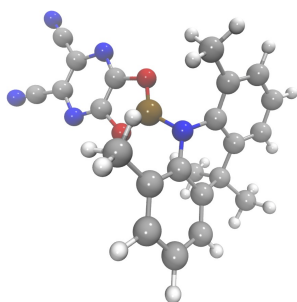

Bent

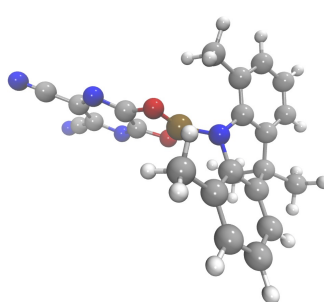

Twisted

S<sub>1</sub> density difference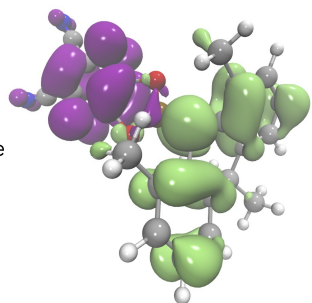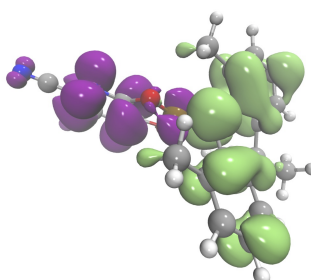

Figure S18: Structure and S<sub>1</sub> density difference associated with the S<sub>1</sub> state optimised structure of **2b**.



**2c**

Structure

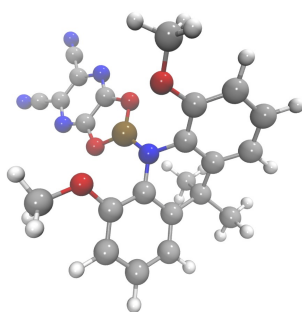

Bent

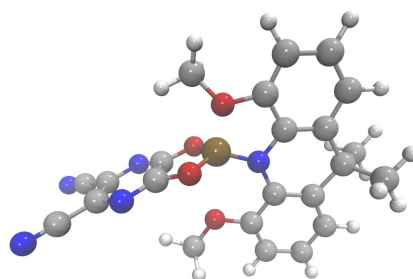

Twisted

**S<sub>0</sub>**S<sub>1</sub> density difference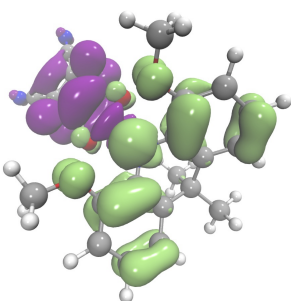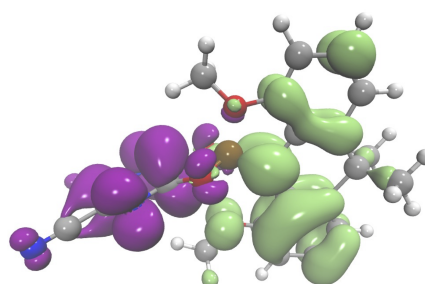

Figure S19: Structure and S<sub>1</sub> density difference associated with the ground state optimised structure of **2c**.

**2c**

Structure

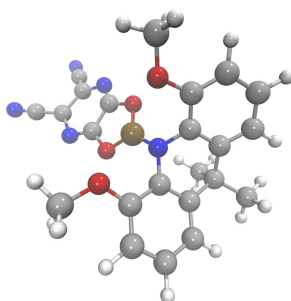

Bent

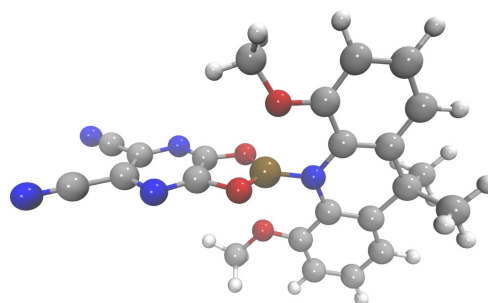

Twisted

**T<sub>1</sub>**T<sub>1</sub> density difference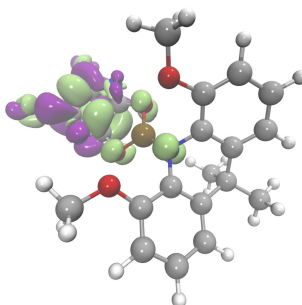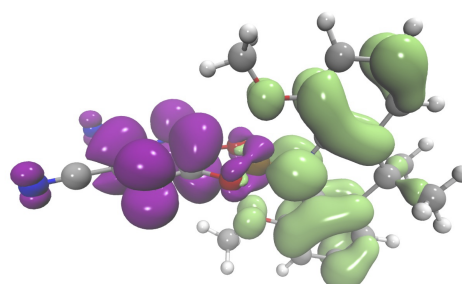

Figure S20: Structure and T<sub>1</sub> density difference associated with the T<sub>1</sub> state optimised structure of **2c**.

**2c**

**S<sub>1</sub>**

Structure

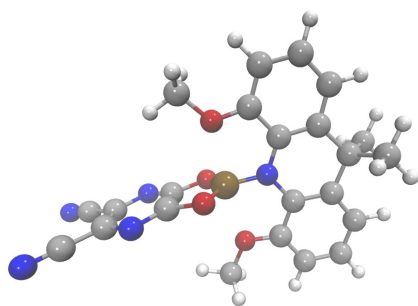

Twisted

S<sub>1</sub> density difference

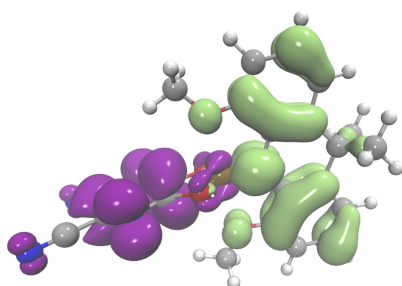

Figure S21: Structure and S<sub>1</sub> density difference associated with the S<sub>1</sub> state optimised structure of **2c**.

**2d**

**S<sub>0</sub>**

Structure

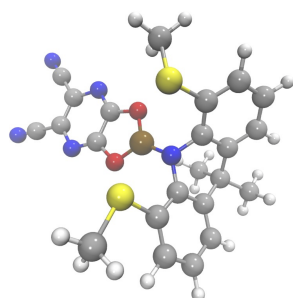

Bent

S<sub>1</sub> density difference

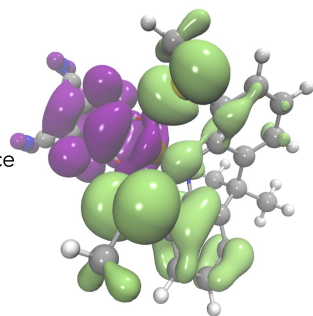

Figure S22: Structure and S<sub>1</sub> density difference associated with the ground state optimised structure of **2d**.

**2d**

**T<sub>1</sub>**

Structure

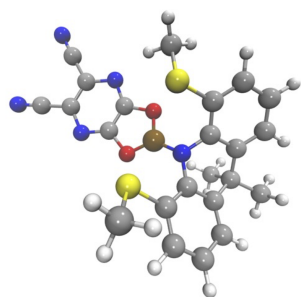

Bent

T<sub>1</sub> density difference

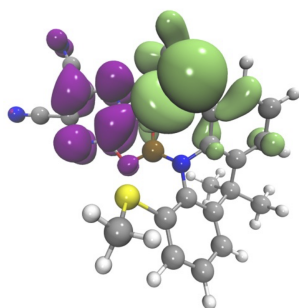

Figure S23: Structure and T<sub>1</sub> density difference associated with the T<sub>1</sub> state optimised structure of **2d**.

**2d**

**S<sub>1</sub>**

Structure

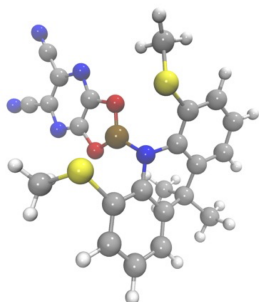

Bent

S<sub>1</sub> density difference

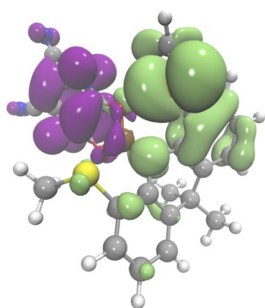

Figure S24: Structure and S<sub>1</sub> density difference associated with the S<sub>1</sub> state optimised structure of **2d**.

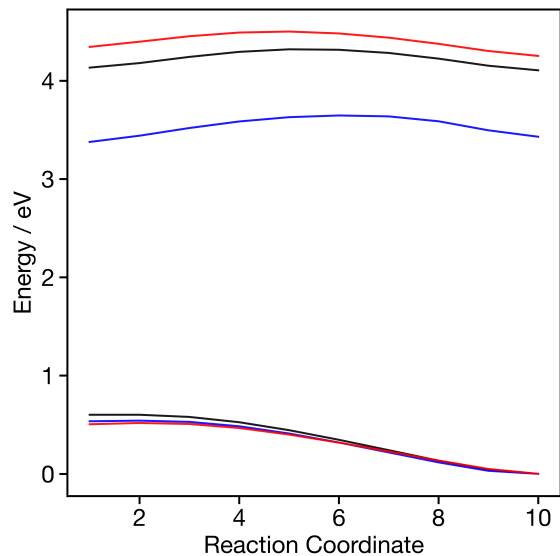

Figure S25: Potential of the ground and excited state along a linear interpolations in internal coordinates (LIICs) between the twisted and planar ground state optimised structures of **1a**. Blue is calculated using the PBE0 functional, black with the optimally tuned LC-BLYP and red with the optimally tuned  $\omega$ B97X-D4 exchange and correlation functional.

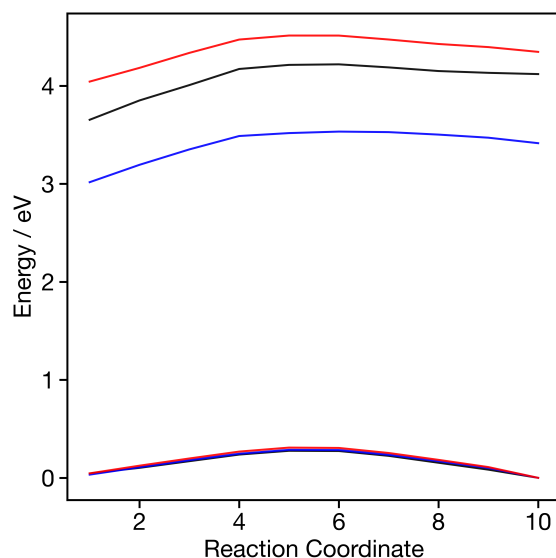

Figure S26: Potential of the ground and excited state along a linear interpolations in internal coordinates (LIICs) between the twisted and bent ground state optimised structures of **1b**. Blue is calculated using the PBE0 functional, black with the optimally tuned LC-BLYP and red with the optimally tuned  $\omega$ B97X-D4 exchange and correlation functional.

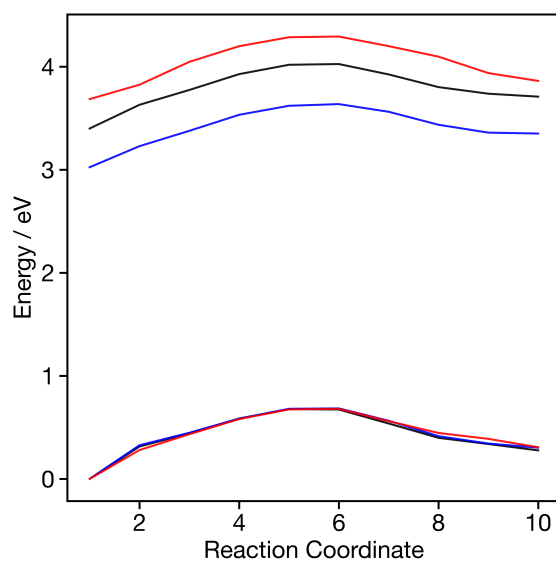

Figure S27: Potential of the ground and excited state along a linear interpolations in internal coordinates (LIICs) between the twisted and bent ground state optimised structures of **1c**. Blue is calculated using the PBE0 functional, black with the optimally tuned LC-BLYP and red with the optimally tuned  $\omega$ B97X-D4 exchange and correlation functional.

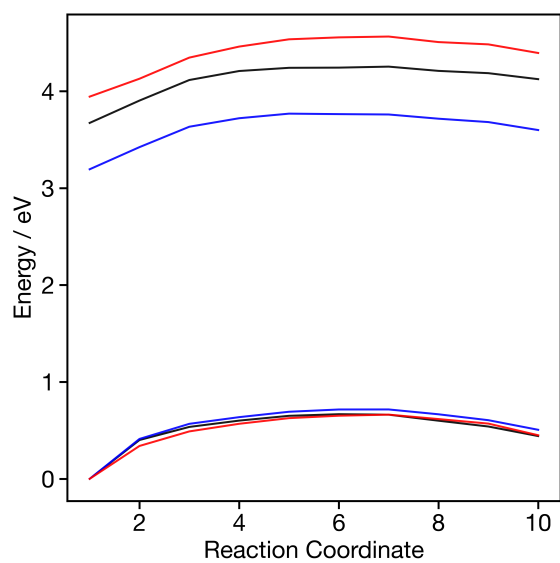

Figure S28: Potential of the ground and excited state along a linear interpolations in internal coordinates (LIICs) between the twisted and bent ground state optimised structures of **1d**. Blue is calculated using the PBE0 functional, black with the optimally tuned LC-BLYP and red with the optimally tuned  $\omega$ B97X-D4 exchange and correlation functional.

| S <sub>0</sub> State |           |           |                            |                            |                                 |                                 |                 |             |                        |
|----------------------|-----------|-----------|----------------------------|----------------------------|---------------------------------|---------------------------------|-----------------|-------------|------------------------|
|                      | B-N / Å   | B-X / Å   | $\angle_{\phi} / ^{\circ}$ | $\angle_{\tau} / ^{\circ}$ | E <sub>S<sub>1</sub></sub> / eV | E <sub>T<sub>1</sub></sub> / eV | $\Delta E$ / eV | $f_{S_1}$   | SOC / cm <sup>-1</sup> |
| <b>1a</b>            | 1.41±0.03 | –         | 92.8±78.9                  | 0.4±11.3                   | 4.00±0.09                       | 3.10±0.10                       | 0.90±0.12       | 0.43±0.13   | 0.58±0.52              |
| <b>1b</b>            | 1.42±0.03 | 3.19±0.17 | 110.7±30.1                 | 11.7±23.1                  | 3.70±0.20                       | 3.11±0.13                       | 0.59±0.25       | 0.23±0.13   | 0.56±0.39              |
| <b>1c</b>            | 1.44±0.03 | 2.73±0.14 | 91.6±7.2                   | 0.6±6.6                    | 3.38±0.16                       | 3.14±0.11                       | 0.24±0.18       | 0.02±0.03   | 1.07±0.64              |
| <b>1d</b>            | 1.46±0.03 | 2.97±0.23 | 90.1±14.7                  | 14.0±10.1                  | 3.64±0.17                       | 3.05±0.11                       | 0.60±0.20       | 0.06±0.07   | 2.48±1.99              |
| <b>2a</b>            | 1.40±0.02 | –         | 89.5±45.6                  | 18.7±38.3                  | 3.83±0.50                       | 3.02±0.25                       | 0.90±0.14       | 0.36±0.15   | 0.53±0.40              |
| <b>2b</b>            | 1.42±0.03 | 2.97±0.23 | 99.4±20.4                  | 42.5±25.5                  | 3.99±0.23                       | 3.04±0.12                       | 0.96±0.25       | 0.28±0.14   | 0.96±0.61              |
| <b>2c</b>            | 1.49±0.03 | 2.23±0.43 | 91.0±10.7                  | 1.7±11.4                   | 3.58±0.18                       | 3.03±0.12                       | 0.56±0.22       | 0.009±0.01  | 1.90±1.30              |
| <b>2d</b>            | 1.50±0.03 | 2.67±0.40 | 87.9±18.6                  | 0.1±7.0                    | 3.56±0.15                       | 2.94±0.12                       | 0.61±0.19       | 0.035±0.038 | 3.06±2.37              |
| S <sub>1</sub> State |           |           |                            |                            |                                 |                                 |                 |             |                        |
|                      | B-N / Å   | B-X / Å   | $\angle_{\phi} / ^{\circ}$ | $\angle_{\tau} / ^{\circ}$ | E <sub>S<sub>1</sub></sub> / eV | E <sub>T<sub>1</sub></sub> / eV | $\Delta E$ / eV | $f_{S_1}$   | SOC / cm <sup>-1</sup> |
| <b>1a</b>            | 1.50±0.03 | –         | 91.1±60.7                  | 1.6±8.7                    | 3.11±0.17                       | 2.71±0.16                       | 0.40±0.20       | 0.07±0.05   | 0.36±0.19              |
| <b>1b</b>            | 1.51±0.03 | 3.02±0.11 | 85.1±6.8                   | 0.2±4.6                    | 2.61±0.13                       | 2.60±0.12                       | 0.02±0.01       | 0.004±0.005 | 0.08±0.09              |
| <b>1c</b>            | 1.52±0.03 | 2.78±0.15 | 93.6±6.8                   | 0.8±5.0                    | 2.40±0.17                       | 2.39±0.17                       | 0.01±0.01       | 0.004±0.004 | 0.15±0.27              |
| <b>1d</b>            | 1.52±0.04 | 3.02±0.28 | 97.0±12.3                  | 7.8±6.6                    | 2.44±0.18                       | 2.41±0.17                       | 0.03±0.06       | 0.003±0.03  | 0.75±1.07              |
| <b>2a</b>            | 1.53±0.03 | –         | 0.3±8.8                    | 4.5±14.5                   | 2.30±0.13                       | 2.29±0.12                       | 0.02±0.02       | 0.005±0.007 | 0.05±0.06              |
| <b>2b</b>            | 1.53±0.03 | 2.97±0.23 | 86.1±5.6                   | 26.9±22.4                  | 2.46±0.19                       | 2.40±0.15                       | 0.06±0.06       | 0.015±0.015 | 0.21±0.18              |
| <b>2c</b>            | 1.55±0.04 | 2.34±0.13 | 91.6±9.5                   | 1.6±6.2                    | 2.23±0.17                       | 2.22±0.16                       | 0.01±0.02       | 0.003±0.002 | 0.27±0.48              |
| <b>2d</b>            | 1.55±0.04 | 2.73±0.25 | 92.6±23.7                  | 0.4±8.0                    | 2.22±0.25                       | 2.18±0.22                       | 0.04±0.05       | 0.0069±0.01 | 0.88±0.99              |

Table S16: Analysis of the geometric and electronic structure properties obtained from 15 ps of *ab initio* molecular dynamics in the electronic ground (S<sub>0</sub>) and first singlet excited state (S<sub>1</sub>).
